# Supplementary material for: Long-Term Structural Changes in the Osteochondral Unit in Patients with Osteoarthritis Undergoing Corrective Osteotomy with Platelet-Rich Plasma or Stromal Vascular Fraction Post-Treatment
Source: MDPI journal article supplement (doi:10.3390/biomedicines12051044), 2024-05-09
Supplement: s1 [file s1]

Table S1. Histomorphometric characteristics of the examined subgroups of patients with KOA prior to and 18 months after the injection.

|           | PRP subgroup       |                                                    | SVF subgroup       |                                                                | p (Mann-Whitney U-test)                                          |
|-----------|--------------------|----------------------------------------------------|--------------------|----------------------------------------------------------------|------------------------------------------------------------------|
|           | Prior to injection | 18 months after injection                          | Prior to injection | 18 months after injection                                      |                                                                  |
| BV. %     |                    |                                                    |                    |                                                                |                                                                  |
| Tibia     | 31.2 [21.3;35.7]   | 34.7 [28.2;37.1]<br><b>p=0.099<sup>1</sup></b>     | 28.1 [24.4;38.7]   | 46.9 [41;55]<br><b>p=0.001<sup>1*</sup></b>                    | p=0.595 <sup>2</sup><br><b>p&lt;0.001<sup>3*</sup></b>           |
| Femur     | 23.7 [20.3;29.6]   | 29.2 [22.2;31.7]<br>p <sup>1</sup> =0.271          | 21.8 [17.7;29.4]   | 21.4 [19.2;25.4]<br>p <sup>1</sup> =0.532                      | p=0.305 <sup>2</sup><br><b>p=0.004<sup>3*</sup></b>              |
| Cr.V. %   |                    |                                                    |                    |                                                                |                                                                  |
| Tibia     | 31.7 [26.6;38.2]   | 18.6 [15.6;23.9]<br><b>p&lt;0.001<sup>1*</sup></b> | 30 [28.6;34.2]     | 11.3 [10.6;15.2]<br><b>p<sup>1</sup>&lt;0.001<sup>1*</sup></b> | p=0.389 <sup>2</sup><br><b>p&lt;0.001<sup>3*</sup></b>           |
| Femur     | 16.7 [14.4; 23.6]  | 39 [32.7;41.5]<br><b>p&lt;0.001<sup>1*</sup></b>   | 20.1 [15.7;28.7]   | 24.6 [23.3;25.6]<br>p <sup>1</sup> =0.211                      | p=0.116 <sup>2</sup><br><b>p&lt;0.001<sup>3*</sup></b>           |
| Tr.V. %   |                    |                                                    |                    |                                                                |                                                                  |
| Tibia     | 62.2 [60.1;70.3]   | 79.9 [76.8;88.9]<br><b>p&lt;0.001<sup>1*</sup></b> | 79.6 [68.2;84.8]   | 85.8 [83.1;86.3]<br><b>p=0.008<sup>1*</sup></b>                | <b>p&lt;0.001<sup>2*</sup></b><br>p=0.148 <sup>3</sup>           |
| Femur     | 78.6 [76.6;82.5]   | 79 [76.9;82.6]<br>p <sup>1</sup> =0.865            | 70.4 [66.1;74.6]   | 86.6 [82.7;88.4]<br><b>p&lt;0.001<sup>1*</sup></b>             | <b>p&lt;0.001<sup>2*</sup></b><br><b>p&lt;0.001<sup>3*</sup></b> |
| Cr.Wi. mm |                    |                                                    |                    |                                                                |                                                                  |
| Tibia     | 1.4 [1;1.6]        | 0.54 [0.52;0.59]<br><b>p&lt;0.001<sup>1*</sup></b> | 0.47 [0.42;0.68]   | 1 [0.68;1.24]<br><b>p=0.001<sup>1*</sup></b>                   | <b>p&lt;0.001<sup>2*</sup></b><br><b>p&lt;0.001<sup>3*</sup></b> |
| Femur     | 0.75 [0.54;0.84]   | 0.62 [0.51;0.74]<br>p=0.244 <sup>1</sup>           | 0.46 [0.33;0.52]   | 0.74 [0.72;0.78]<br><b>p&lt;0.001<sup>1*</sup></b>             | <b>p&lt;0.001<sup>2*</sup></b><br><b>p=0.014<sup>3</sup></b>     |
| Ch.Wi mm  |                    |                                                    |                    |                                                                |                                                                  |
| Tibia     | 0.4 [0.4;0.5]      | 1.06 [0.68;1.18]<br><b>p&lt;0.001<sup>1*</sup></b> | 0.66 [0.52;0.83]   | 1.04 [0.94;1.22]<br><b>p&lt;0.001<sup>1*</sup></b>             | <b>p&lt;0.001<sup>2*</sup></b><br>p=0.436 <sup>3</sup>           |
| Femur     | 1.14 [0.95;1.64]   | 1.51 [1.31;1.92]<br><b>p=0.019<sup>1*</sup></b>    | 0.8 [0.61;0.86]    | 0.89 [0.83;0.93]<br><b>p=0.009<sup>1*</sup></b>                | p=0.004 <sup>2*</sup><br><b>p&lt;0.001<sup>3*</sup></b>          |
| Tr.Th. µm |                    |                                                    |                    |                                                                |                                                                  |
| Tibia     | 0.1 [0.07;0.14]    | 0.14 [0.13;0.17]<br><b>p=0.006<sup>1*</sup></b>    | 0.12 [0.1;0.15]    | 0.16 [0.14;0.26]<br><b>p=0.001<sup>1*</sup></b>                | p=0.249 <sup>2</sup><br><b>p=0.021<sup>3*</sup></b>              |
| Femur     | 0.14 [0.11;0.16]   | 0.13 [0.13;0.14]<br>p=0.293 <sup>1</sup>           | 0.12 [0.1;0.15]    | 0.16 [0.09;0.23]<br><b>p=0.051<sup>1*</sup></b>                | p=0.161 <sup>2</sup><br>p=0.126 <sup>3</sup>                     |

|                                  |                  |                                                    |                  |                                                    |                                                     |
|----------------------------------|------------------|----------------------------------------------------|------------------|----------------------------------------------------|-----------------------------------------------------|
| Tr.Sp. $\mu\text{m}$<br>Tibia    | 1.06 [0.98;1.2]  | 0.92<br>[0.72;1.07]<br><b>p=0.002<sup>1</sup>*</b> | 1.01 [0.97;1.1]  | 0.76 [0.63;0.86]<br><b>p&lt;0.001<sup>1</sup>*</b> | p=0.217 <sup>2</sup><br><b>p=0.009<sup>3</sup>*</b> |
| Femur                            | 0.9 [0.8;1.02]   | 0.88<br>[0.72;0.97]<br>p=0.177 <sup>1</sup>        | 0.88 [0.64;0.96] | 0.77 [0.58;0.82]<br>p=0.125 <sup>1</sup>           | p=0.161 <sup>2</sup><br><b>p=0.007<sup>3</sup>*</b> |
| Tr.N. n/mm <sup>3</sup><br>Tibia | 0.65 [0.35;0.72] | 1.14 [0.37;1.96]<br><b>p=0.009<sup>1</sup>*</b>    | 0.81 [0.55;0.97] | 0.75 [0.66;0.81]<br>p=0.532 <sup>1</sup>           | <b>p=0.026<sup>2</sup>*</b><br>p=0.148 <sup>3</sup> |
| Femur                            | 0.9 [0.83;1.19]  | 1.22 [1.04;1.29]<br><b>p=0.017<sup>1</sup>*</b>    | 1.06 [1.02;1.09] | 1.54 [0.88;1.83]<br><b>p=0.008<sup>1</sup>*</b>    | p=0.202 <sup>2</sup><br><b>p=0.029<sup>3</sup>*</b> |

Note: All statistically significant differences are indicated with an asterisk (\*)

<sup>1</sup> - Differences between values before and 18 months after the injection;

<sup>2</sup> - Differences between subgroups before injection

<sup>3</sup> - Differences between subgroups after the injection

BV, bone volume; Cr.V, subchondral bone volume; Tr.V, trabecular bone volume; Cr.Wi, subchondral plate height; Ch.Wi, articular cartilage thickness. Tr.Th, trabecular thickness; Tr.Sp, intertrabecular space; Tr.N, number of trabeculae.
